# Supplementary material for: Hydrogen solubility of stishovite provides insights into water transportation to the deep Earth
Source: Copernicus journal article supplement (doi:10.5194/se-15-215-2024), 2024-02-09
Supplement: Supplementary file 1 [file se-15-215-2024-supplement.zip]

Archive with 3 entries (3 files):
- Table S2-Mineral water solubility in subducted slabs.xlsx
- se-15-215-2024-supplement-title-page.pdf
- Table S1-The formula fits the data used and the calculated results.xlsx
