# Supplementary material for: Hydrogen solubility of stishovite provides insights into water transportation to the deep Earth
Source: Copernicus journal article supplement (doi:10.5194/se-15-215-2024), 2024-02-09
Supplement: Supplementary file 1 [file se-15-215-2024-supplement.zip › se-15-215-2024-supplement-title-page.pdf]

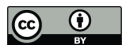

*Supplement of*

**Hydrogen solubility of stishovite provides insights into water transportation to the deep Earth**

**Mengdan Chen et al.**

*Correspondence to:* Lei Kang (kanglei@nwu.edu.cn)

- se-15-215-2024-supplement-title-page.pdf
- Table S1-The formula fits the data used and the calculated results.xlsx
- Table S2-Mineral water solubility in subducted slabs.xlsx

The copyright of individual parts of the supplement might differ from the article licence.
