# Supplementary material for: Hydrogen solubility of stishovite provides insights into water transportation to the deep Earth
Source: Copernicus journal article supplement (doi:10.5194/se-15-215-2024), 2024-02-09
Supplement: Supplementary file 1 [file se-15-215-2024-supplement.zip › Table S2-Mineral water solubility in subducted slabs.xlsx]

## Sheet: S2
Pressure (GPa)	T (°C)	f (GPa)	Depth (km)	Water solubility (wt. ppm) of minerals									Water solubility (wt. ppm) in subducted slabs
Cold subducton				water solubility of Cpx	Cpx in MORB	Cpx in sediment	water solubility of Grt	Grt in MORB	Grt in sediment	water solubility of st	st in MORB	st in sediment	MORB in total	Sediment in total		Thermodynamic models for water solubility of minerals
10	680	5.75193e+06	297	41.9486	23.0718	4.19486	120.773	42.2706	30.1933	674.544	67.4544	168.636	132.797	203.024		Mineral	A (GPa/barn)	n	∆V (cm3/mol)	∆H (kJ/mol)	B (kJ/mol)	Reference
11	700	1.77105e+07	313.5	30.0913	16.5502	3.00913	121.329	42.4651	30.3322	763.067	76.3067	190.767	135.322	224.108		Pyrope	67.9	0.5	5.71			Lu and Keppler (1997)
12	720	5.07419e+07	330	21.2994	10.6497	2.12994	120.247	48.0989	30.0618	847.528	84.7528	211.882	143.501	244.074		Cpx	18.5	1	14.62	-11.117		Gavrilenko (2008)
13	740	1.36186e+08	363	14.9245	6.71601	1.49245	117.809	53.0141	31.8085	926.37	92.637	231.593	152.367	264.894		Sti	23.9	0.5	4.29	-3.065	7.69	This study
14	760	3.44385e+08	396	10.3792	3.63271	1.03792	114.289	62.8587	30.8579	998.379	99.8379	249.595	166.329	281.491
15	780	8.24724e+08	429	7.1792	1.43584	0.71792	109.94	76.958	29.6838	1062.67	106.267	265.668	184.661	296.07
16	800	1.87873e+09	462	4.9475	0.247375	0.49475	104.991	89.2421	29.3974	1118.68	111.868	279.671	201.358	309.563
17	815	4.4055e+09	495	3.25184	0	0.325184	98.4894	83.716	29.5468	1171.4	175.709	292.849	259.425	322.721
18	830	9.93737e+09	528	2.12834	0	0.212834	91.831	78.0564	27.5493	1215.52	182.328	303.88	260.385	331.642
19	845	2.16169e+10	561	1.38874	0	0.138874	85.1663	68.1331	25.5499	1250.99	250.197	312.747	318.331	338.436
20	860	4.54526e+10	594	0.904246	0	0.0904246	78.6144	47.1687	23.5843	1277.92	319.479	319.479	366.648	343.154
21	870	1.00603e+11	627	0.558014	0	0.0558014	71.308	17.827	21.3924	1301.58	325.396	325.396	343.223	346.844
22	880	2.16875e+11	660	0.342905	0	0.0342905	64.3836	0	19.3151	1316.95	263.39	329.237	263.39	348.587
23	890	4.55965e+11	693	0.20999	0	0.020999	57.8903	0	17.3671	1324.37	264.874	331.092	264.874	348.48
24	900	9.36069e+11	726	0.128237	0	0.0128237	51.8563	0	15.5569	1324.3	264.86	331.075	264.86	346.644
25	910	1.87858e+12	759	0.0781398	0	0.00781398	46.2933	0	13.888	1317.27	263.455	329.319	263.455	343.214
Hot subducton				water solubility of Cpx	Cpx in MORB	Cpx in sediment	water solubility of Grt	Grt in MORB	Grt in sediment	water solubility of st	st in MORB	st in sediment	MORB in total	Sediment in total
10	930	609437	297	153.653	84.5093	15.3653	175.77	61.5195	43.9425	552.716	55.2716	138.179	201.3	197.487
11	955	1.53343e+06	313.5	121.559	66.8573	12.1559	179.018	62.6564	44.7545	618.724	61.8724	154.681	191.386	211.591
12	980	3.63862e+06	330	94.9771	47.4886	9.49771	180.217	72.0869	45.0543	682.025	68.2025	170.506	187.778	225.058
13	1000	8.54578e+06	363	71.8029	32.3113	7.18029	178.557	80.3508	48.2105	744.466	74.4466	186.117	187.109	241.507
14	1020	1.9193e+07	396	53.7614	18.8165	5.37614	175.351	96.4428	47.3446	803.039	80.3039	200.76	195.563	253.48
15	1040	4.13673e+07	429	39.9443	7.98887	3.99443	170.88	119.616	46.1375	857.116	85.7116	214.279	213.316	264.411
16	1060	8.58328e+07	462	29.4986	1.47493	2.94986	165.407	140.596	46.314	906.23	90.623	226.557	232.694	275.821
17	1080	1.71925e+08	495	21.682	0	2.1682	159.172	135.296	47.7517	950.061	142.509	237.515	277.806	287.435
18	1100	3.33264e+08	528	15.8799	0	1.58799	152.385	129.528	45.7156	988.428	148.264	247.107	277.792	294.411
19	1120	6.26575e+08	561	11.6003	0	1.16003	145.23	116.184	43.5691	1021.27	204.253	255.316	320.437	300.045
20	1140	1.14489e+09	594	8.459	0	0.8459	137.863	82.7176	41.3588	1048.61	262.153	262.153	344.871	304.358
21	1155	2.15046e+09	627	5.96365	0	0.596365	129.361	32.3403	38.8083	1073.73	268.434	268.434	300.774	307.838
22	1170	3.94721e+09	660	4.19319	0	0.419319	120.942	0	36.2826	1093.47	218.694	273.367	218.694	310.069
23	1180	7.50426e+09	693	2.84005	0	0.284005	111.713	0	33.5139	1110.92	222.183	277.729	222.183	311.527
24	1200	1.24708e+10	726	2.06139	0	0.206139	104.716	0	31.4147	1117.49	223.498	279.373	223.498	310.994
25	1210	2.28179e+10	759	1.38938	0	0.138938	96.1271	0	28.8381	1124.87	224.975	281.219	224.975	310.196
Note: Cpx, Clinopyroxene; Grt, garnet; St, stishovite
