# Supplementary material for: Hydrogen solubility of stishovite provides insights into water transportation to the deep Earth
Source: Copernicus journal article supplement (doi:10.5194/se-15-215-2024), 2024-02-09
Supplement: Supplementary file 1 [file Table S1-The formula fits the data used and the calculated results.xlsx]

## Sheet: S1
Pressure (GPa)	Temperature (°C)	Initial water content	Al2O3 content (wt.%)	Water content (ppm)	Reference	Calculated water content (ppm)		Thermodynamic models for water solubility of minerals
10	1200	Water saturation	0.612	210	Chung and Kagi, 2002	387.646		Mineral	A (GPa/barn)	n	∆V (cm3/mol)	∆H (kJ/mol)	B (kJ/mol)	Reference
10	1200	Water saturation	0.751	308	Chung and Kagi, 2002	404.564		Pyrope	67.9	0.5	5.71			Lu and Keppler (1997)
10	1200	Water saturation	0.774	374	Chung and Kagi, 2002	407.369		Cpx	18.5	1	14.62	-11.117		Gavrilenko (2008)
10	1200	Water saturation	0.788	277	Chung and Kagi, 2002	409.164		Sti	23.9	0.5	4.29	-3.065	7.69	This study
10	1200	Water saturation	0.804	368	Chung and Kagi, 2002	411.226
10	1200	Water saturation	0.919	377	Chung and Kagi, 2002	425.949
15	1400	Water saturation	1.257	614	Chung and Kagi, 2002	696.508
15	1400	Water saturation	1.259	647	Chung and Kagi, 2002	696.893
15	1400	Water saturation	1.265	640	Chung and Kagi, 2002	698.05
15	1400	Water saturation	1.281	792	Chung and Kagi, 2002	701.146
15	1400	Water saturation	1.297	570	Chung and Kagi, 2002	704.255
15	1400	Water saturation	1.317	844	Chung and Kagi, 2002	708.161
15	1400	Water saturation	1.321	685	Chung and Kagi, 2002	708.945
15	1400	Water saturation	1.341	759	Chung and Kagi, 2002	712.482
20	1400	Water saturation	4.36	3010	Litasov et al., 2007	2130.94
20	1800	Water saturation	6.07	2380	Litasov et al., 2007	2234.67
20	1700	Water saturation	7.62	2610	Litasov et al., 2007	3490.42
20	1800	Water saturation	0.1	146	Litasov et al., 2007	605.353
20	1800	Water saturation	0.25	175	Litasov et al., 2007	625.682
20	1800	Water saturation	1.4	354	Litasov et al., 2007	804.436
20	1800	Water saturation	1.92	609	Litasov et al., 2007	901.412
20	1200	Water saturation	4.48	2900	Litasov et al., 2007	2757.81
20	1800	Water saturation	4.8	1007	Litasov et al., 2007	1692.93
20	1800	Water saturation	5.13	2150	Litasov et al., 2007	1819.88
26	1200	Water saturation	2.1	618	Litasov et al., 2007	1489.92
25	1400	Water saturation	3.28	1711	Litasov et al., 2007	1811.35
25	1800	Water saturation	3.63	1290	Litasov et al., 2007	1531.86
28	1700	5wt％	4.36	2700	Ishil et al., 2022	1998.61
20	1700	Water saturation	3.43	2500	Zhang et al., 2022	1332.08
19.2	1700	Water saturation	5.37	2700	Zhang et al., 2022	2008.72
